# Supplementary material for: Expression of CARD8 in human atherosclerosis and its regulation of inflammatory proteins in human endothelial cells
Source: PubMed Central journal article supplement (PMC7644683; doi:10.1038/s41598-020-73600-4), 2020-11-05
Supplement: 41598_2020_73600_MOESM1_ESM.pdf [file 41598_2020_73600_MOESM1_ESM.pdf]

## **Expression of CARD8 in human atherosclerosis and its regulation of inflammatory proteins in human endothelial cells**

Geena V Paramel<sup>1</sup>, Glykeria Karadimou<sup>2</sup>, Anna Göthlin Eremo<sup>3</sup>, Liza U Ljungberg<sup>1</sup>, Ulf Hedin<sup>4</sup>, Peder S Olofsson<sup>2, 5</sup>, Lasse Folkersen<sup>6</sup>, Gabrielle Paulsson-Berne<sup>2</sup>, Allan Sirsjö<sup>1</sup>, Karin Fransén<sup>1\*</sup>.

<sup>1</sup>Cardiovascular Research Centre, School of Medical Sciences, Faculty of Medicine and Health, Örebro University, Örebro, Sweden; <sup>2</sup>Laboratory of Immunobiology, Center for Bioelectronic Medicine, Department of Medicine, Solna, Karolinska Institute, Stockholm, Sweden; <sup>3</sup>Department of Clinical Research Laboratory, Faculty of Medicine and Health, Örebro University, Örebro, Sweden; <sup>4</sup>Department of Molecular Medicine and Surgery, Center for Molecular Medicine, Karolinska Institutet, Stockholm, Sweden; <sup>5</sup>Institute of Bioelectronic Medicine, Feinstein Institutes for Medical Research, Manhasset, New York, U.S.A; <sup>6</sup>Institute of Biological Psychiatry, Sankt Hans Hospital, Copenhagen, Denmark.

\* **Corresponding author:** Karin Fransén, Cardiovascular Research Centre, School of Medical Sciences, Örebro University; 70182 Örebro, Sweden. ORCID: 0000-0002-9826-0462. Tel: +46-19-301408; Email: [karin.h.franzen@oru.se](mailto:karin.h.franzen@oru.se)

**Short title:** CARD8 – a regulator of inflammatory proteins

**Key words:** Atherosclerosis, Inflammation, NLRP3, CARD8, Inflammasome

**Supplementary Table S1.** Protein biomarkers available on the CVD II, CVDIII and Inflammation panels. Uncolored cells represents the proteins detected in HUVECs. The colored cells represents proteins that were below the detection level.

| Inflammation panel<br>(culture medium) | CVDII panel (Lysate) | CVD III panel (Lysate) |
|----------------------------------------|----------------------|------------------------|
| IL-8                                   | BMP-6                | TNFRSF14               |
| VEGF-A                                 | ANG-1                | LDL receptor           |
| MCP-3                                  | ADM                  | IL-17RA                |
| OPG                                    | PIGF                 | TNF-R2                 |
| LAP TGF-beta-1                         | IL-4RA               | EPHB4                  |
| uPA                                    | SRC                  | OPG                    |
| IL-6                                   | IL-6                 | ALCAM                  |
| MCP-1                                  | TNFRSF10A            | TFF3                   |
| CXCL11                                 | STK4                 | SELP                   |
| CXCL1                                  | IDUA                 | CSTB                   |
| MMP-1                                  | TNFRSF11A            | MCP-1                  |
| IL-18R1                                | PAR-1                | Gal-3                  |
| CXCL5                                  | TRAIL-R2             | GRN                    |
| HGF                                    | TIE2                 | BLM hydrolase          |
| MMP-10                                 | TF                   | PLC                    |
| Flt3L                                  | IL1RL2               | LTBR                   |
| CXCL6                                  | PDGF subunit B       | FABP4                  |
| CXCL10                                 | IL27                 | TFPI                   |
| 4E-BP1                                 | IL-17D               | PAI                    |
| CD40                                   | CXCL1                | TR                     |
| TNFRSF9                                | Gal-9                | TNFRSF10C              |
| TWEAK                                  | SCF                  | GDF-15                 |
| CCL20                                  | IL-18                | CXCL16                 |
| ADA                                    | SOD2                 | IL-6RA                 |
| CSF-1                                  | FS                   | TR-AP                  |
| IL-1 alpha                             | GLO1                 | Ep-CAM                 |
| SCF                                    | CD84                 | AP-N                   |
| GDNF                                   | PAPPA                | AXL                    |
| CDCP1                                  | DECR1                | IL-1RT1                |
| CD244                                  | TM                   | MMP-2                  |
| IL-7                                   | HO-1                 | FAS                    |
| IL-17C                                 | IL16                 | U-PAR                  |
| IL-17A                                 | SORT1                | CTSD                   |
| AXIN1                                  | PTX3                 | JAM-A                  |
| TRAIL                                  | PSGL-1               | SHPS-1                 |
| IL-20RA                                | MMP-7                | CASP-3                 |
| CXCL9                                  | Dkk-1                | uPA                    |
| CST5                                   | LPL                  | ST2                    |

|             |                      |                |
|-------------|----------------------|----------------|
| IL-2RB      | HB-EGF               | t-PA           |
| OSM         | BNP                  | IGFBP-7        |
| IL-2        | PD-L2                | CD93           |
| TSLP        | CTSL1                | CTS2           |
| CCL4        | TGM2                 | ICAM-2         |
| CD6         | HSP 27               | PDGF subunit A |
| BDNF        | NEMO                 | TNF-R1         |
| IL-18       | PARP-1               | IGFBP-2        |
| SLAMF1      | FGF-21               | vWF            |
| TGF-alpha   | RAGE                 | PECAM-1        |
| MCP-4       | CD40-L               | IL-18BP        |
| CCL11       | SLAMF7               | SELE           |
| TNFSF14     | ADAM-TS13            | ITGB2          |
| FGF-23      | Protein BOC          | MMP-9          |
| IL-10RA     | IL-1ra               | IL2-RA         |
| FGF-5       | PRSS27               | CD163          |
| LIF-R       | LOX-1                | MEPE           |
| FGF-21      | GIF                  | Notch 3        |
| CCL19       | PlgR                 | TIMP4          |
| IL-15RA     | CTRC                 | CNTN1          |
| IL-10RB     | FGF-23               | CDH5           |
| IL-22 RA1   | SPON2                | TLT-2          |
| PD-L1       | GH                   | CCL24          |
| Beta-NGF    | SERPINA12            | AZU1           |
| TRANCE      | REN                  | DLK-1          |
| IL-12B      | MERTK                | SPON1          |
| IL-24       | TIM                  | MPO            |
| IL-13       | THBS2                | RETN           |
| ARTN        | VSIG2                | IGFBP-1        |
| IL-10       | AMBP                 | CHIT1          |
| TNF         | PRELP                | CCL22          |
| CCL23       | XCL1                 | PSP-D          |
| CD5         | CEACAM8              | PI3            |
| MIP-1 alpha | CCL17                | MB             |
| IL-20       | CCL3                 | TNFSF13B       |
| SIRT2       | IgG Fc receptor II-b | PRTN3          |
| CCL28       | ITGB1BP2             | PCSK9          |
| DNER        | DCN                  | OPN            |
| EN-RAGE     | PRSS8                | PGLYRP1        |
| IL-33       | AGRP                 | CPA1           |
| IFN-gamma   | GDF-2                | Gal-4          |
| FGF-19      | FABP2                | IL-1RT2        |
| IL-4        | THPO                 | CCL15          |

|        |           |            |
|--------|-----------|------------|
| LIF    | MARCO     | CPB1       |
| NRTN   | GT        | CHI3L1     |
| MCP-2  | MMP-12    | SCGB3A2    |
| CASP-8 | ACE2      | EGFR       |
| CCL25  | hOSCAR    | COL1A1     |
| CX3CL1 | TNFRSF13B | PON3       |
| NT-3   | LEP       | MMP-3      |
| ST1A1  | CA5A      | RARRES2    |
| STAMPB | CD4       | KLK6       |
| IL-5   | VEGF-D    | NT-pro BNP |
| TNFB   | HAOX1     | CCL16      |

**Supplementary Table S2.** Summary of differentially expressed proteins in the CARD8 knock down HUVECs according to OLINK proteomics data. Fold change in CARD8 knock down vs. Control knock down cells; significance at FDR ≤ 10%.

| CVDII Panel        |                                |        |                                                            |
|--------------------|--------------------------------|--------|------------------------------------------------------------|
| Protein ID         | Fold Change(log <sub>2</sub> ) | FDR    | Protein name                                               |
| IL6                | -0,411                         | 0,005  | Interleukin-6                                              |
| CXCL1              | -0,157                         | 0,006  | C-X-C motiff chemokine                                     |
| IL18               | -0,220                         | 0,017  | Interleukin-18                                             |
| IL27               | -1,134                         | 0,018  | Interleukin-27                                             |
| TRAIL-R2/TNFRSF10B | -0,131                         | 0,023  | TNF-related apoptosis-inducing ligand receptor 2           |
| ANG1/ANGPT1        | 0,747                          | 0,023  | Angiopoietin-1                                             |
| TM/THBD            | 0,188                          | 0,023  | Thrombomodulin                                             |
| HSP27/HSPB1        | -0,100                         | 0,023  | Heat shock 27 kDa protein                                  |
| IL17D              | 0,203                          | 0,029  | Interleukin-17D                                            |
| PTX3               | -0,276                         | 0,033  | Pentraxin-related protein                                  |
| BMP6               | 0,156                          | 0,047  | Bone morphogenetic protein 6                               |
| PAR1/F2R           | 0,114                          | 0,066  | Proteinase-activated receptor 1                            |
| CVDIII Panel       |                                |        |                                                            |
| Protein ID         | Fold Change(log <sub>2</sub> ) | FDR    | Protein name                                               |
| t-PA/PLAT          | 0,310                          | 0,011  | Tissue-type plasminogen activator                          |
| AXL                | 0,301                          | 0,011  | Tyrosine-protein kinase receptor UFO                       |
| EPHB4              | 0,392                          | 0,045  | Ephrin type-B receptor 4                                   |
| LTBR               | 0,172                          | 0,046  | Lymphotoxin-beta receptor                                  |
| MCP-1/CCL2         | -0,196                         | 0,046  | Monocyte chemotactic protein 1                             |
| TFF3               | 1,415                          | 0,046  | Trefoil factor 3                                           |
| ALCAM              | 0,589                          | 0,046  | CD166 antigen                                              |
| PDGF-A             | 0,537                          | 0,046  | Platelet-derived growth factor subunit A                   |
| CTSZ               | 0,219                          | 0,046  | Cathepsin Z                                                |
| TNF-R1/TNFRSF1A    | 0,131                          | 0,059  | Tumor necrosis factor receptor 1                           |
| IL-6RA             | 0,140                          | 0,071  | Interleukin-6 receptor subunit alpha                       |
| Ep-CAM             | 0,224                          | 0,083  | Epithelial cell adhesion molecule                          |
| MMP-2              | 0,474                          | 0,083  | Matrix metalloproteinase-2                                 |
| LDL receptor/LDLR  | 0,729                          | 0,094  | Low-density lipoprotein receptor                           |
| CSTB               | 0,065                          | 0,094  | Cystatin-B                                                 |
| IGFBP-7            | 0,344                          | 0,094  | Insulin-like growth factor-binding protein 7               |
| ICAM-2             | 0,268                          | 0,094  | Intercellular adhesion molecule 2                          |
| SHPS-1/SIRPA       | 0,474                          | 0,094  | Tyrosine-protein phosphatase non-receptor type substrate 1 |
| Inflammation Panel |                                |        |                                                            |
| Protein ID         | Fold Change(log <sub>2</sub> ) | FDR    | Protein name                                               |
| CXCL6              | -1,901                         | 0,0003 | C-X-C motif chemokine 6                                    |
| IL6                | -0,610                         | 0,0007 | Interleukin-6                                              |
| CCL20              | -1,230                         | 0,0009 | C-C motif chemokine 20                                     |
| IL18R1             | -1,014                         | 0,0032 | Interleukin-18 receptor 1                                  |
| CXCL1              | -0,543                         | 0,0066 | C-X-C motif chemokine 1                                    |
| CD40               | -0,435                         | 0,0066 | CD40L receptor                                             |
| ADA                | -0,577                         | 0,0074 | Adenosine Deaminase                                        |
| MCP3/CCL7          | -0,549                         | 0,014  | Monocyte chemotactic protein 3                             |

|                 |        |        |                                                               |
|-----------------|--------|--------|---------------------------------------------------------------|
| MCP1/CCL2       | -0,211 | 0,0156 | Monocyte chemotactic protein 1                                |
| 4E-BP1/EIF4EBP1 | -0,978 | 0,0156 | Eukaryotic translation initiation factor 4E-binding protein 1 |
| IL8/CXCL8       | -0,285 | 0,0163 | Interleukin-8                                                 |
| VEGF-A          | -0,202 | 0,0262 | Vascular endothelial growth factor A                          |
| OPG/TNFRSF11B   | -0,251 | 0,0348 | Osteoprotegerin                                               |
| TWEAK/TNFSF12   | -0,732 | 0,0359 | Tumor necrosis factor (Ligand) superfamily, member 12         |
| CSF1            | -0,264 | 0,0382 | Macrophage colony-stimulating factor 1                        |
| TNFRSF9         | -0,506 | 0,0439 | Tumor necrosis factor receptor superfamily member 9           |
| MMP10           | -0,146 | 0,065  | Matrix metalloproteinase-10                                   |
| uPA/PLAU        | -0,270 | 0,0693 | Urokinase-type plasminogen activator                          |
| MMP1            | -0,021 | 0,0711 | Matrix metalloproteinase-1                                    |
| CXCL5           | -0,641 | 0,0969 | C-X-C motif chemokine 5                                       |

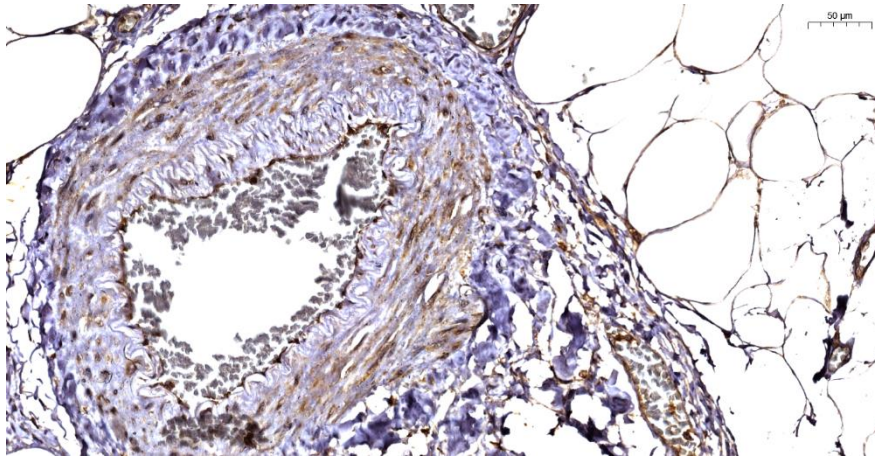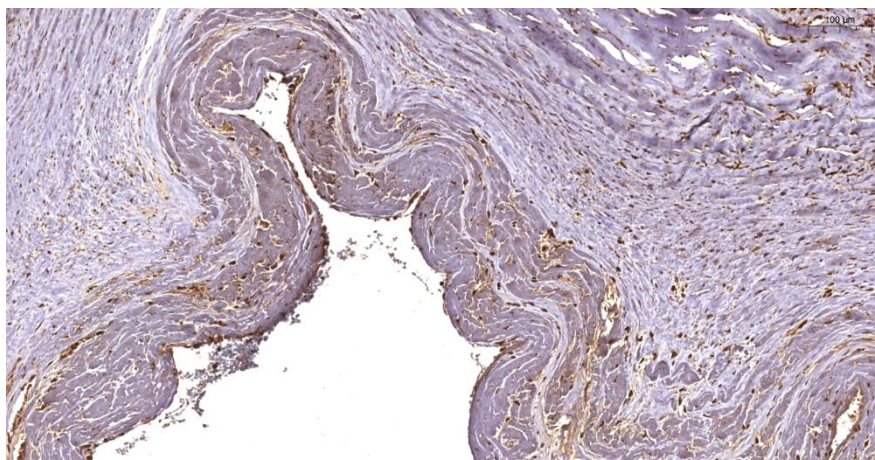

**Supplementary material Figure 1.** Immunostaining of CARD8 in non-atherosclerotic arteries (original picture)

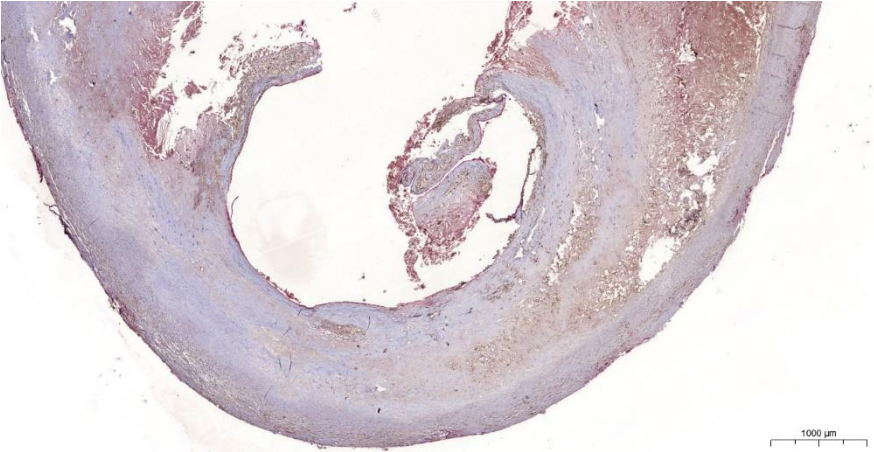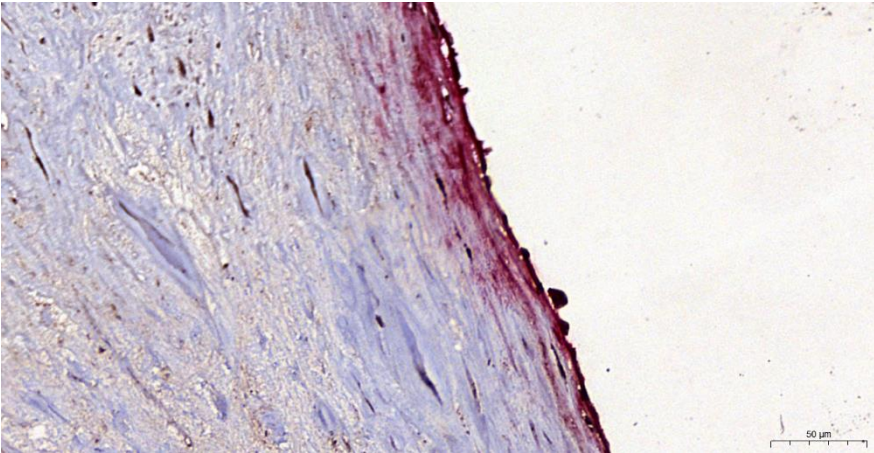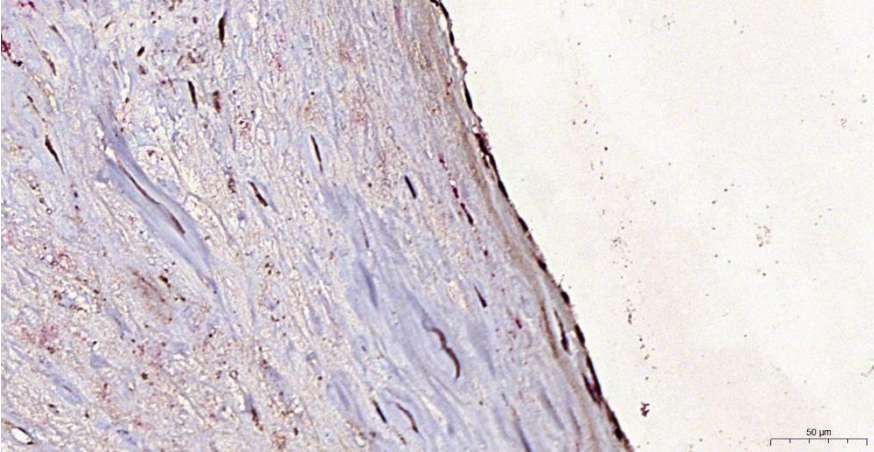

**Supplementary material Figure 2 A.** Representative image of immunostaining of human carotid atherosclerotic plaque (original picture)



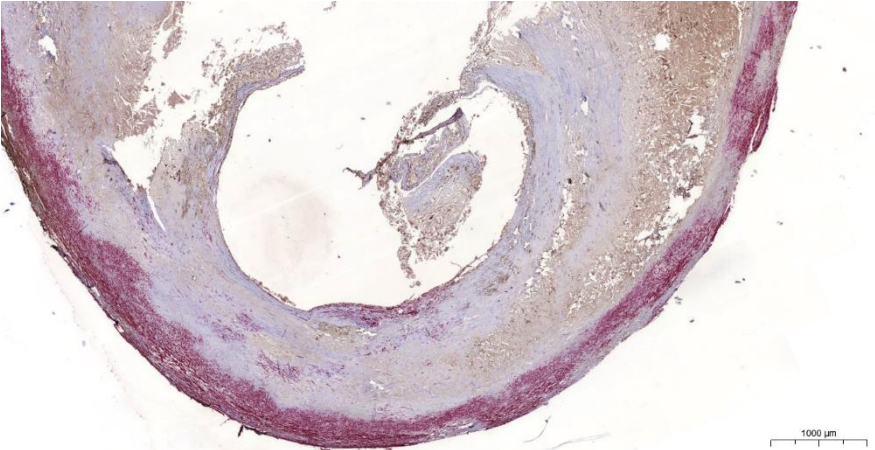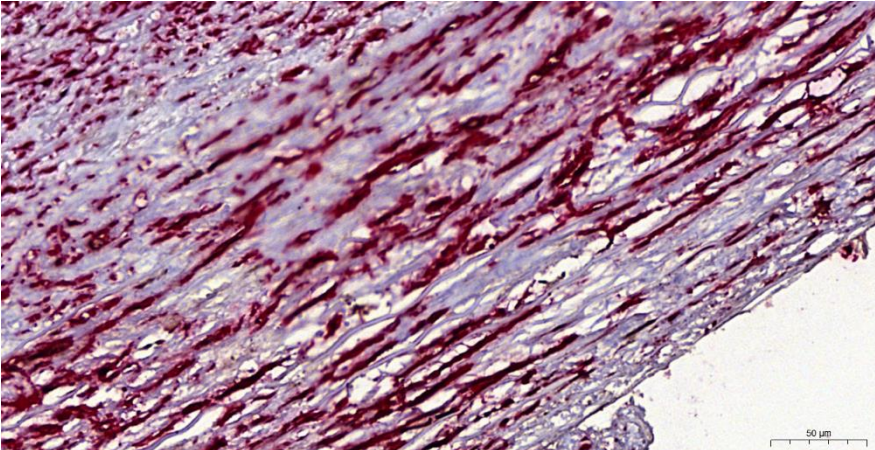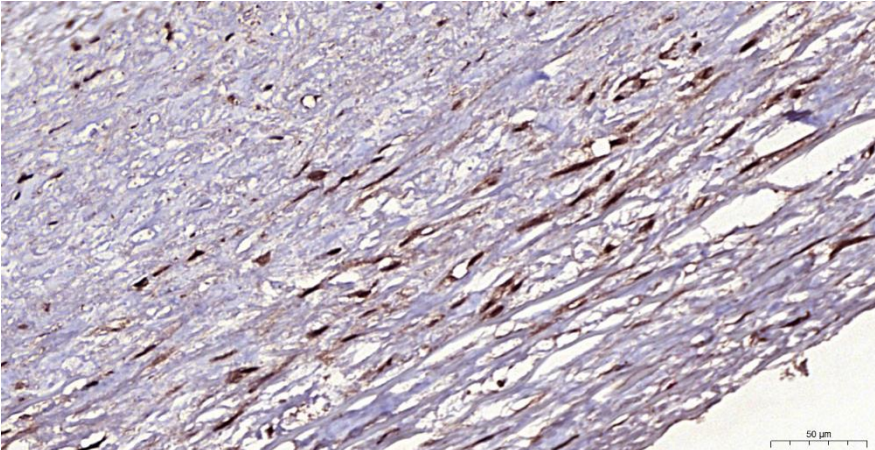

**Supplementary material Figure 2 B.** Representative image of immunostaining of human carotid atherosclerotic plaque (original picture)

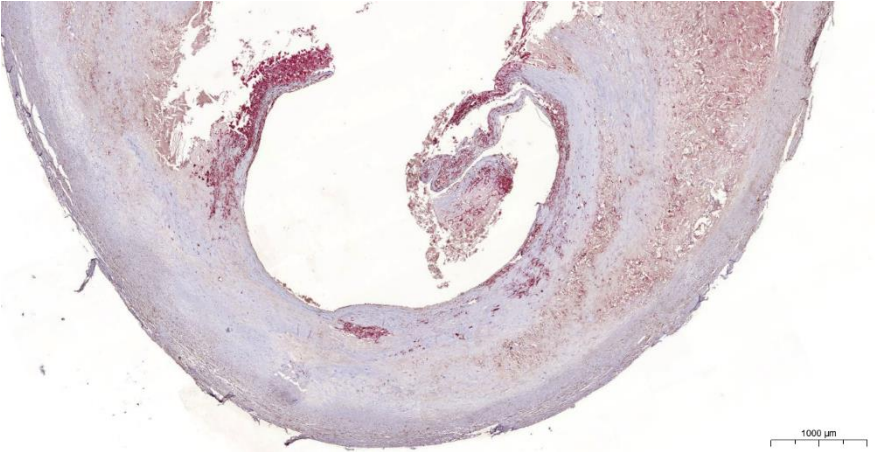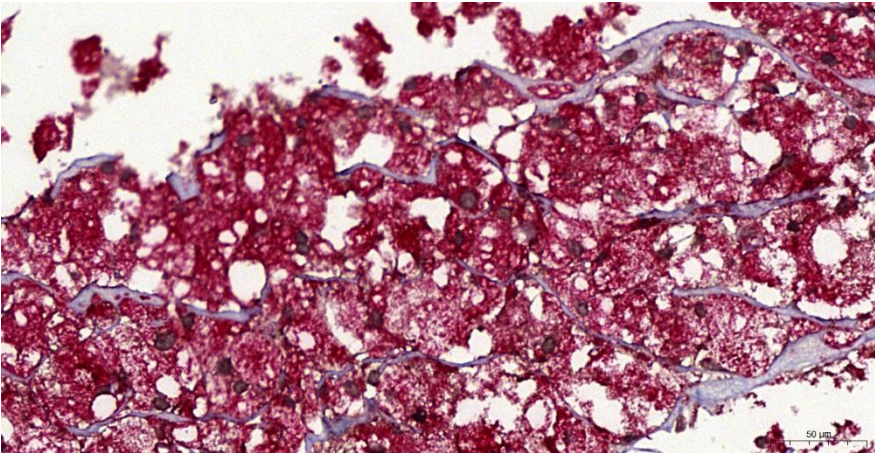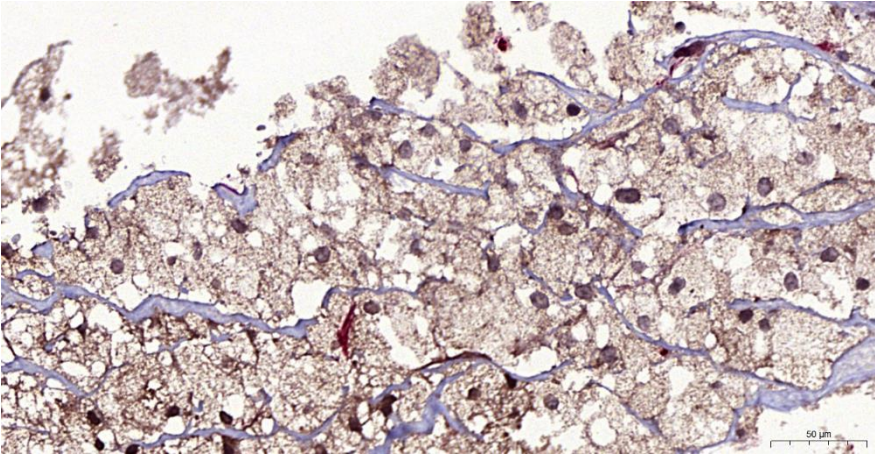

**Supplementary material Figure 2 C.** Representative image of immunostaining of human carotid atherosclerotic plaque (original picture)

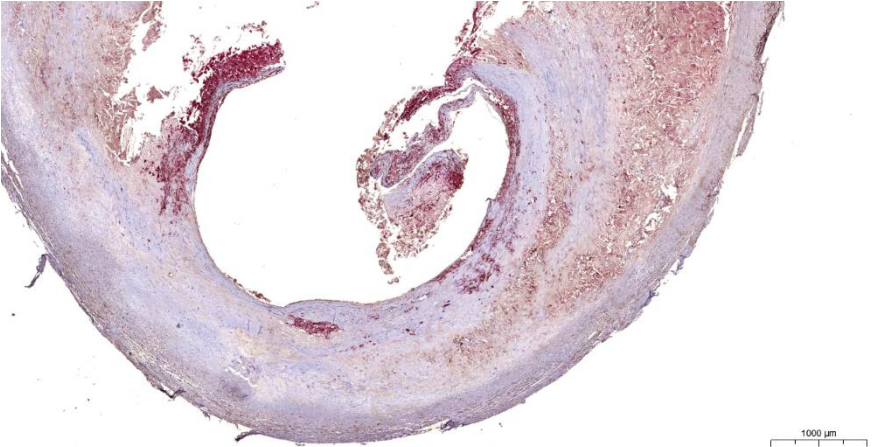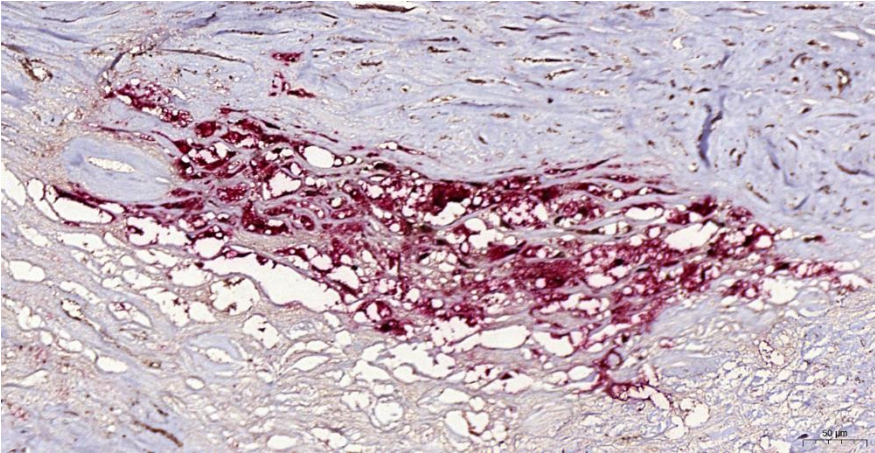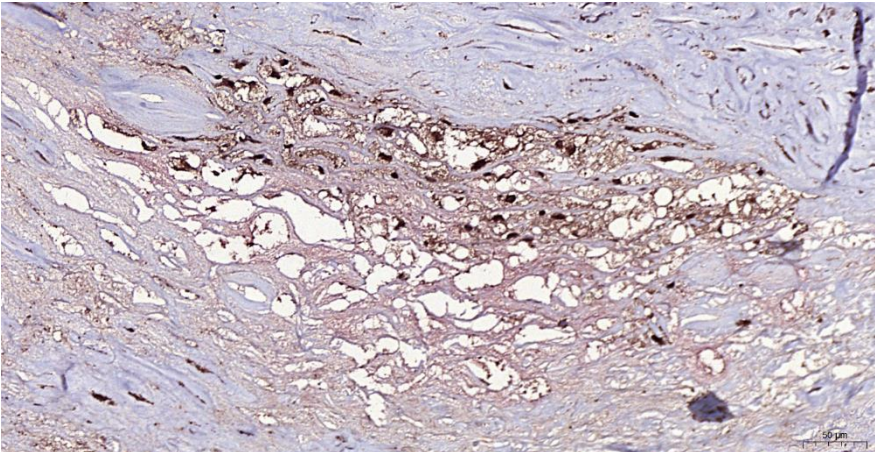

**Supplementary material Figure 2 D.** Representative image of immunostaining of human carotid atherosclerotic plaque (original picture)

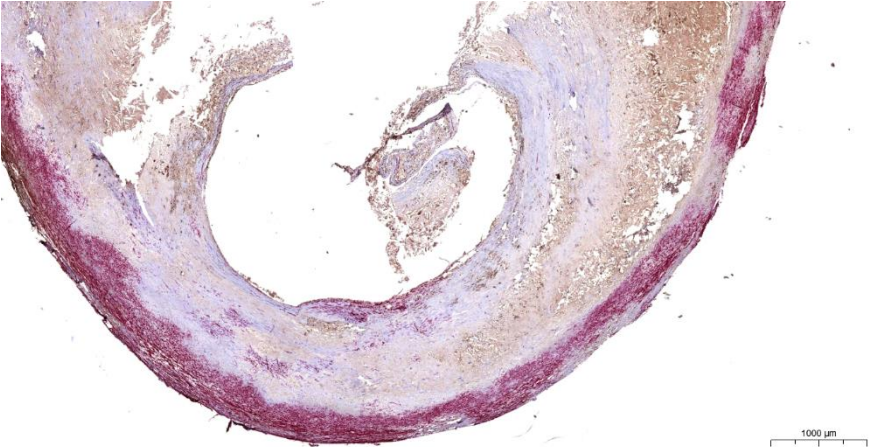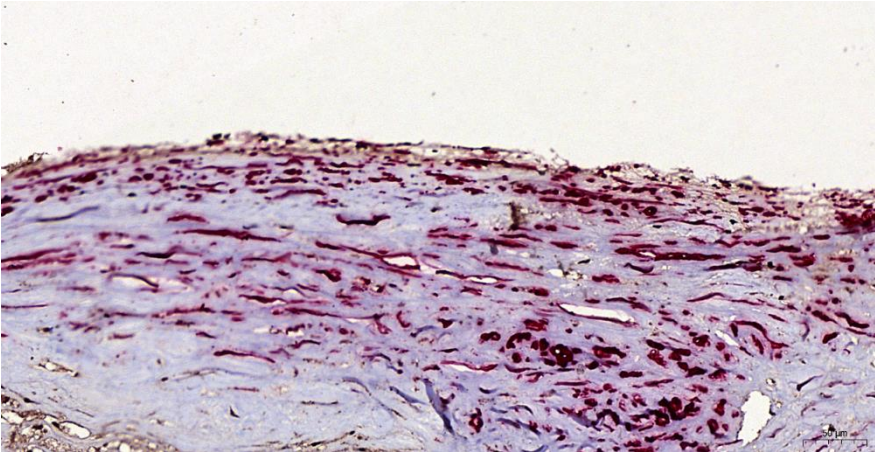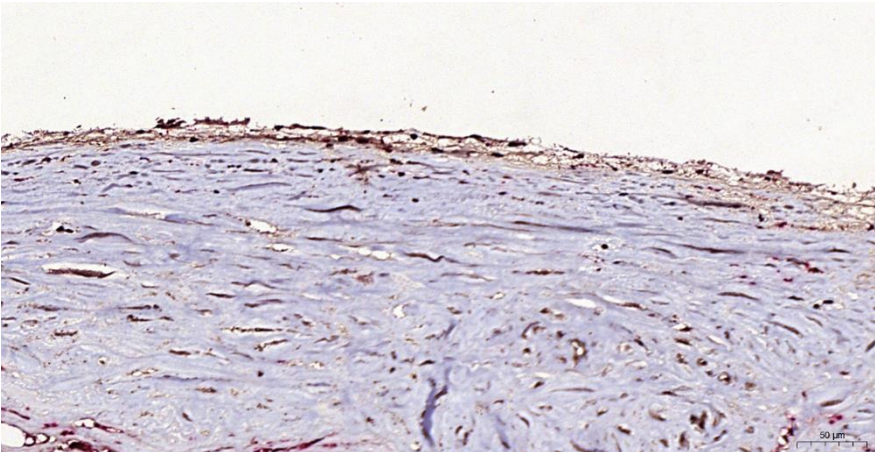

**Supplementary material Figure 2 E.** Representative image of immunostaining of human carotid atherosclerotic plaque (original picture)

Supplementary Figure 3 C: Uncropped Western blots for CARD8 and  $\beta$ -actin expression from repeated experiments. The membrane was developed for both the proteins simultaneously using species specific IRDye® Secondary Antibodies (Licor).

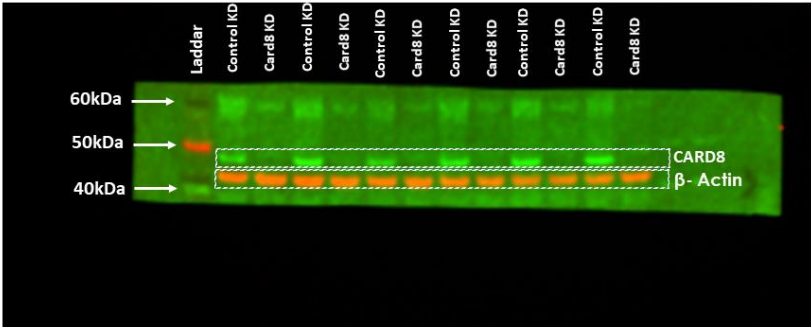

**Supplementary material Figure 4:** Expression of CARD8 mRNA and protein in control and *CARD8* knock down HUVECs. (full blot)

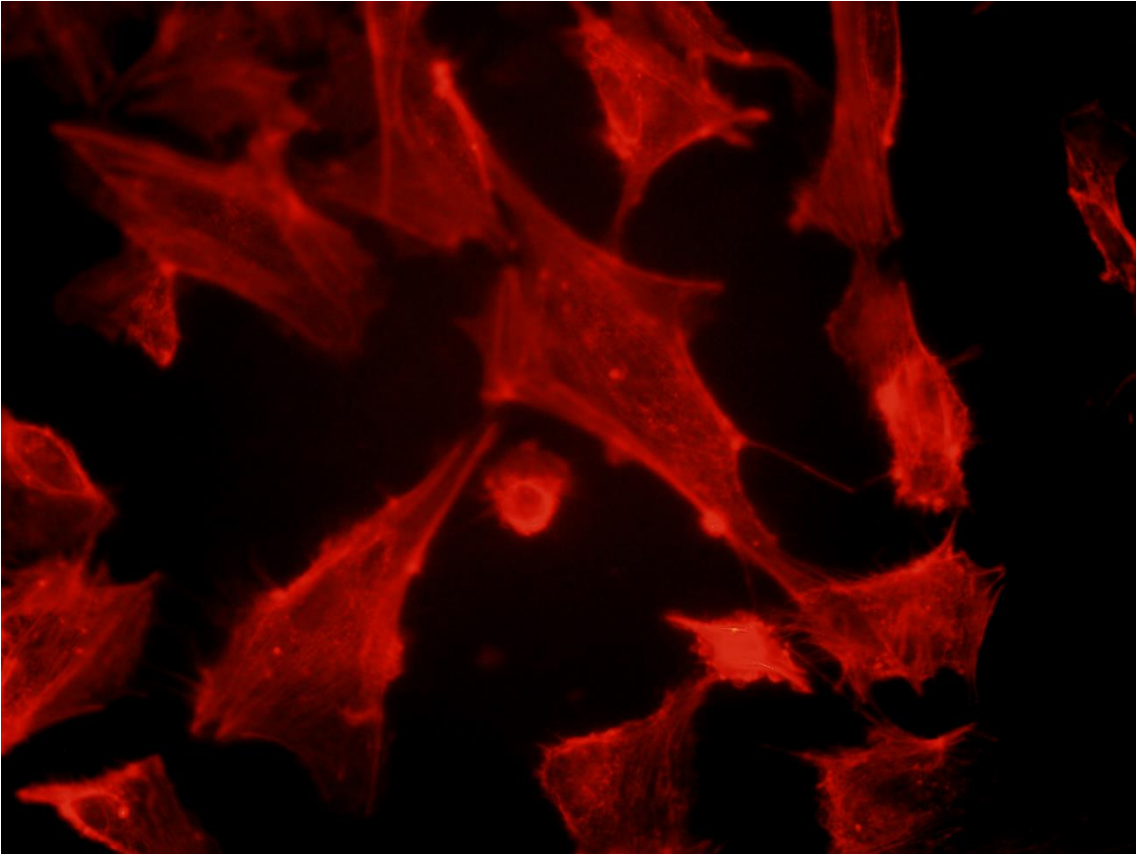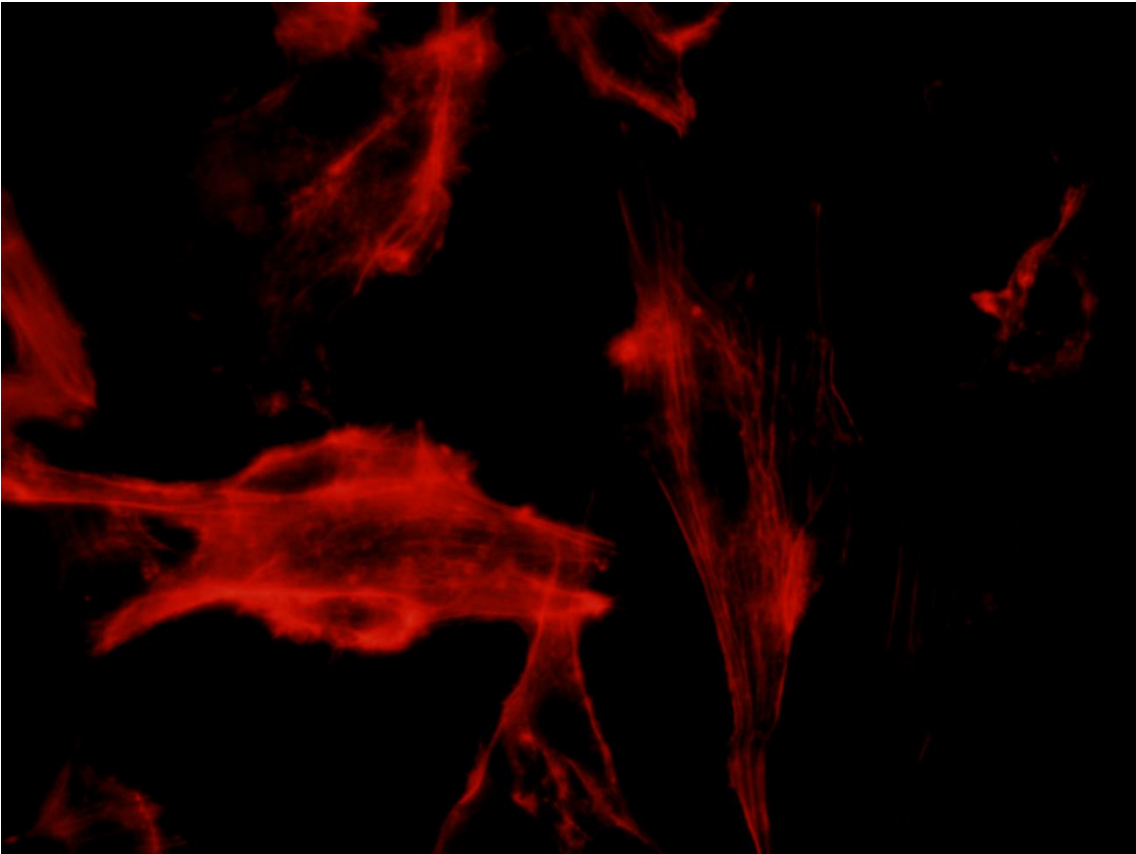

**Supplementary material Figure 5.** Subcellular localization of CARD8 in HUVEC. (Actin)

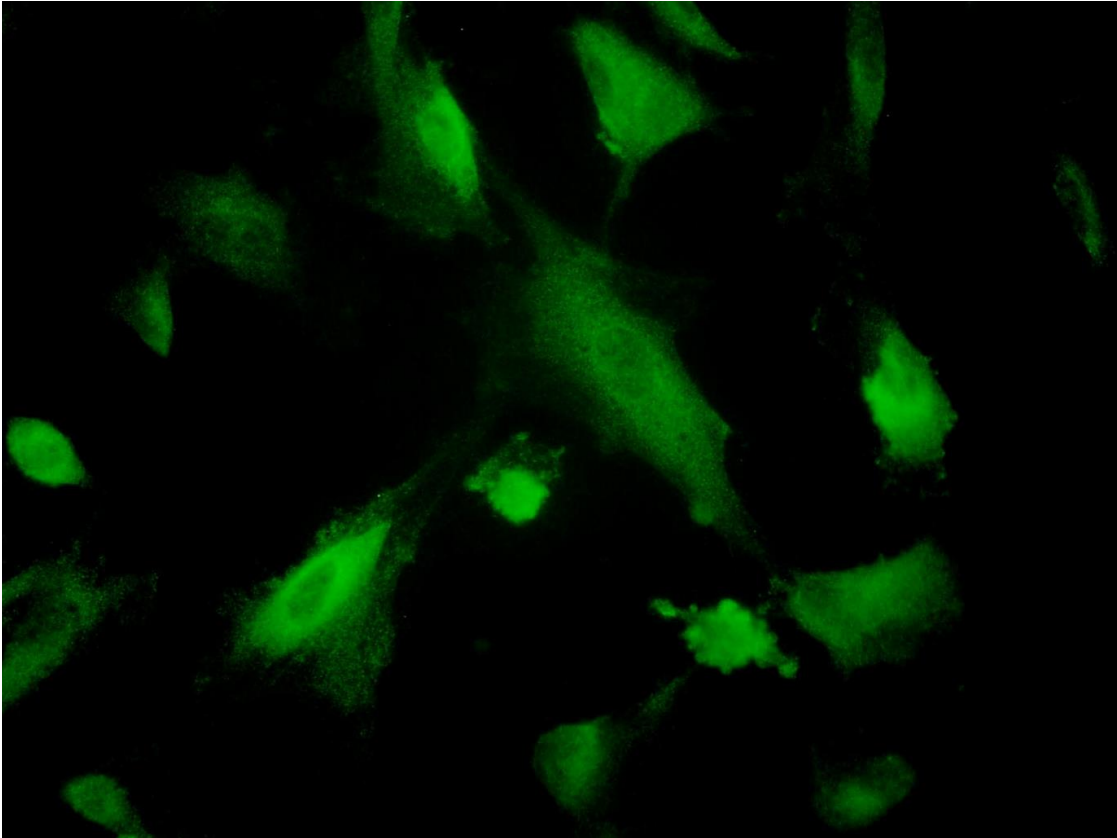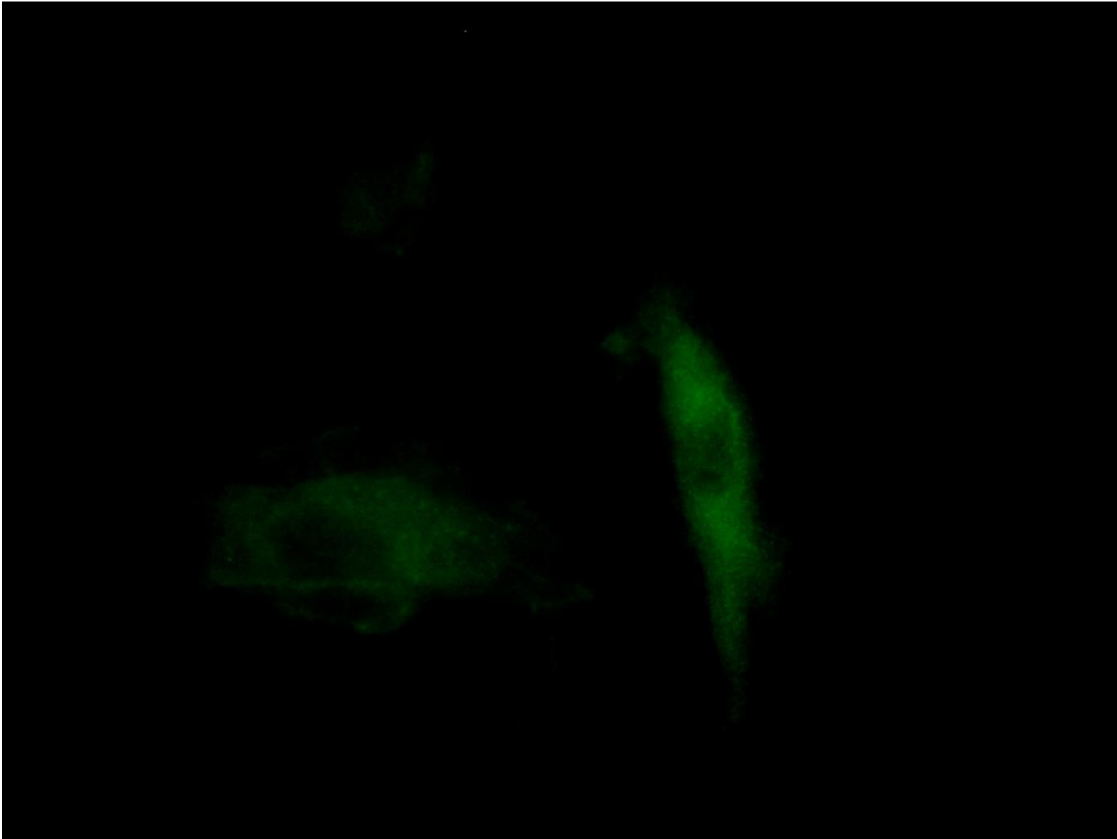

**Supplementary material Figure 5.** Subcellular localization of CARD8 in HUVEC. (CARD8)

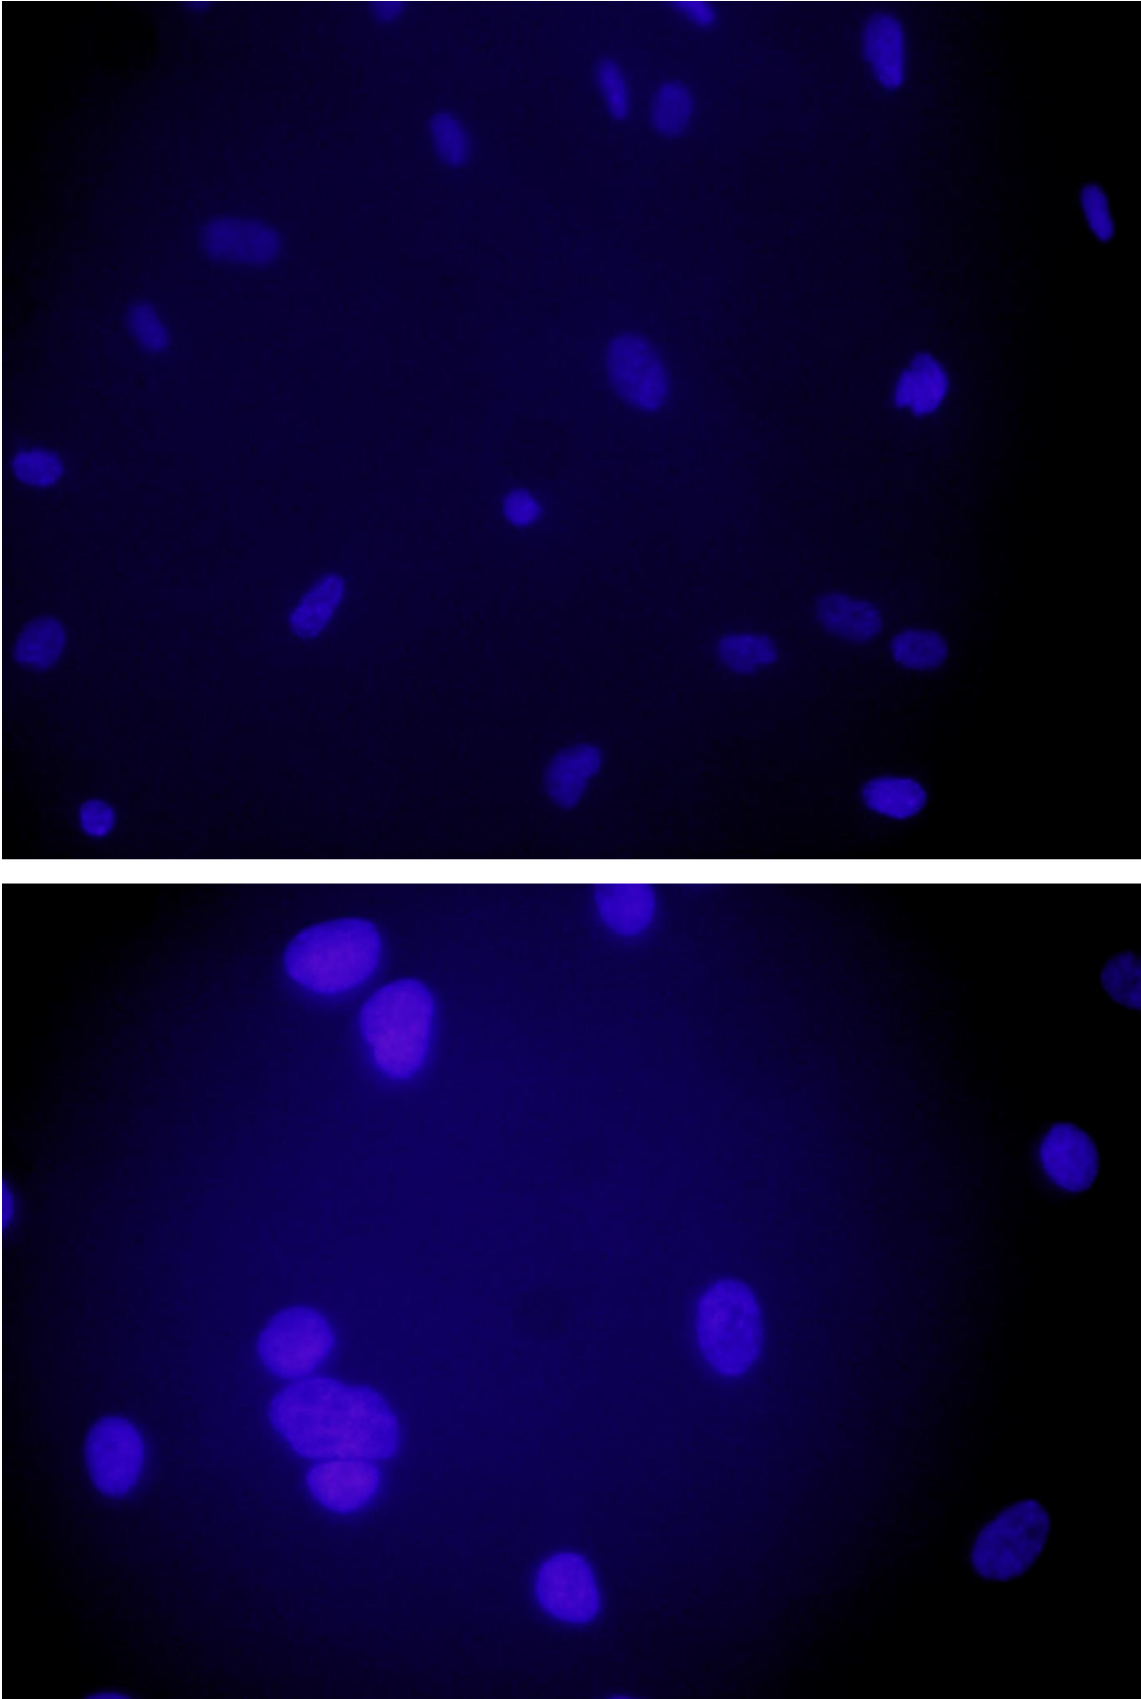

**Supplementary material Figure 5.** Subcellular localization of CARD8 in HUVEC. (DAPI)



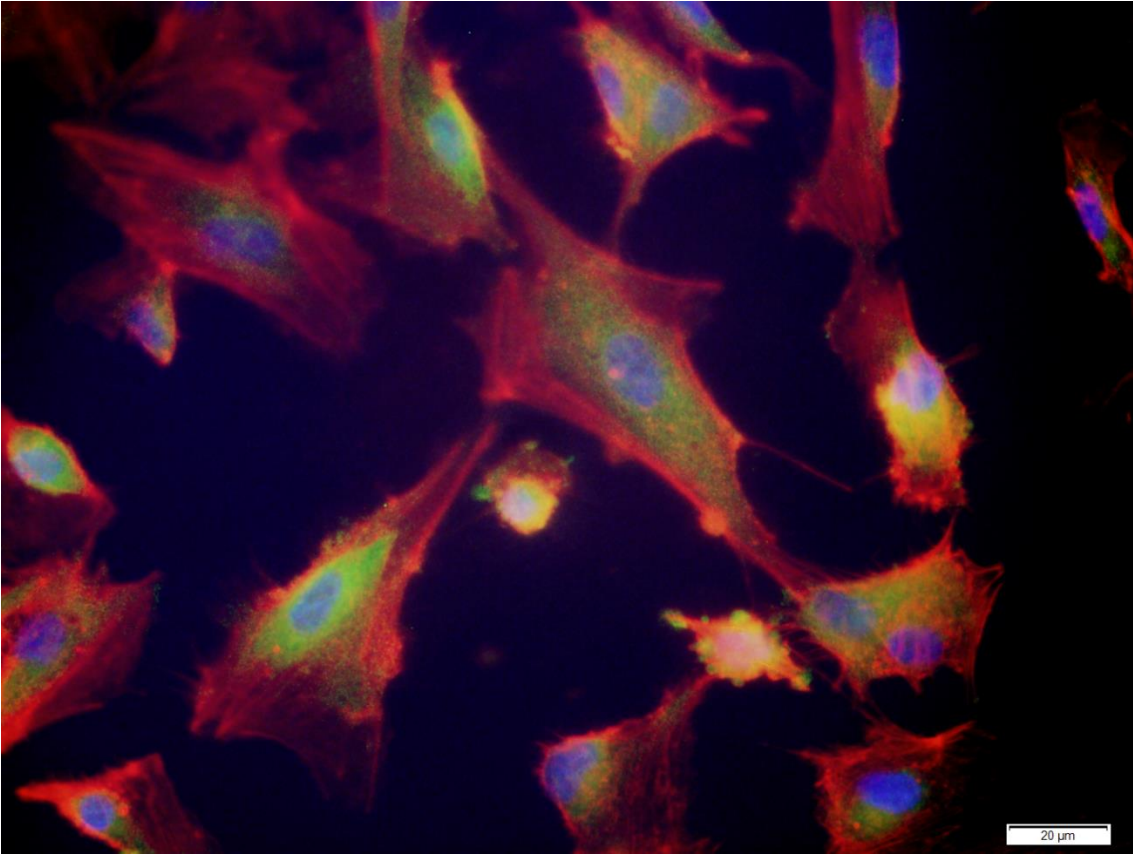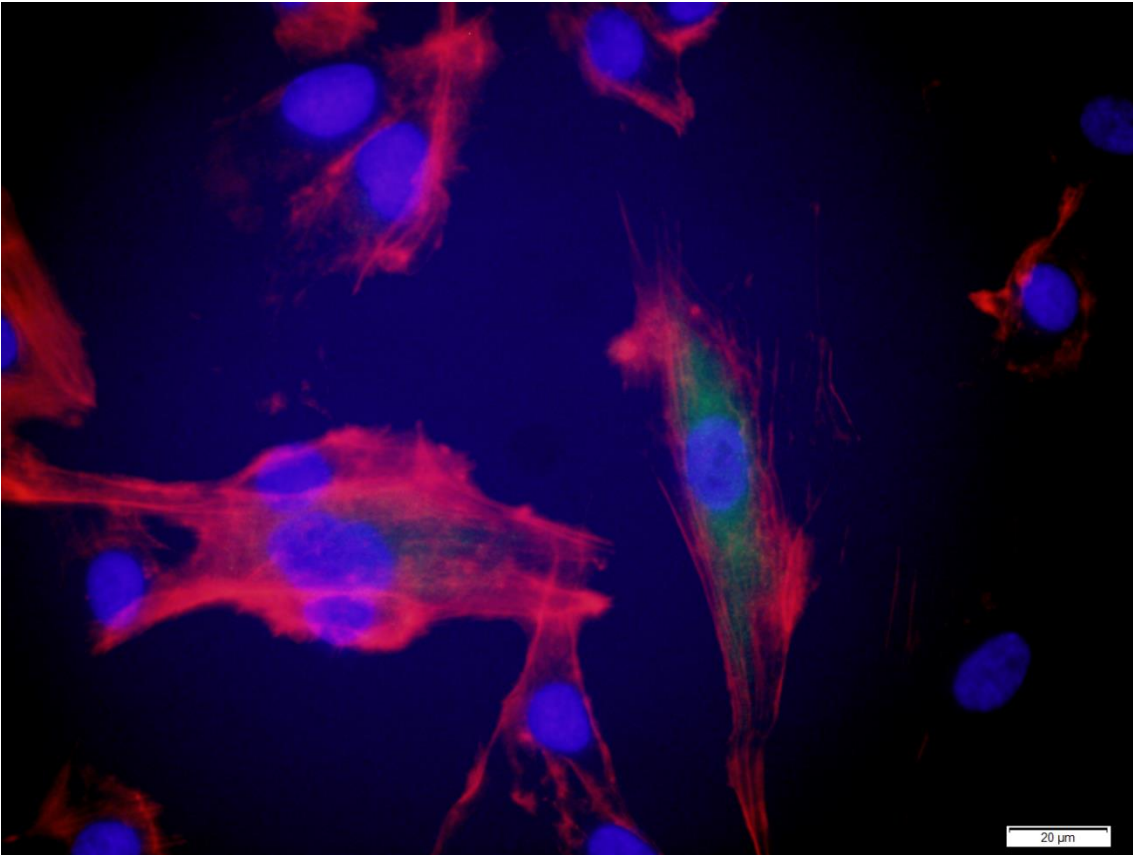

Supplementary material Figure 5. Subcellular localization of CARD8 in HUVEC. (Merge)
